# Supplementary material
Source: PubMed Central journal article supplement (PMC3196122)
Supplement: supp_M111.257949_jbc.M111.257949-1.pdf [file supp_M111.257949_jbc.M111.257949-1.pdf]

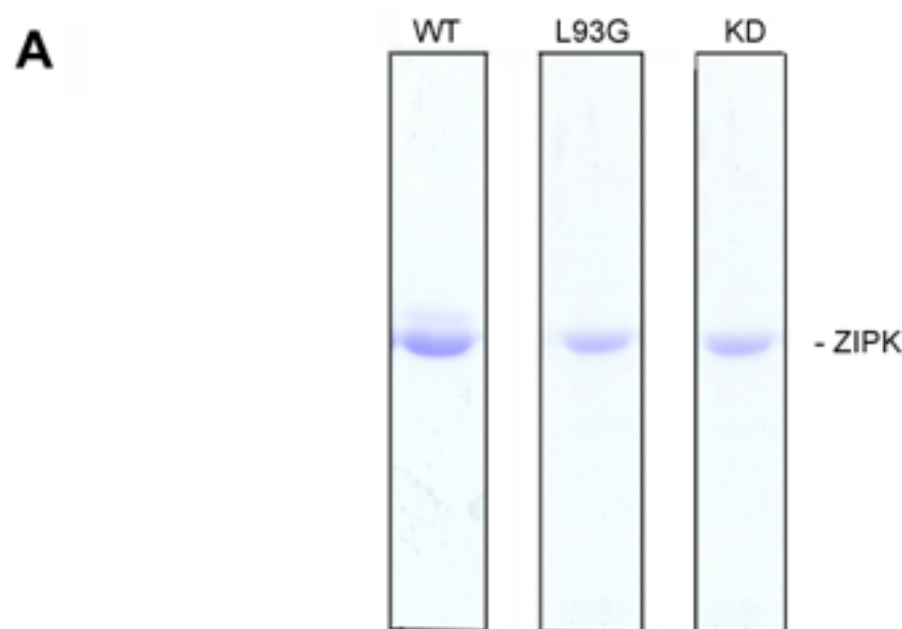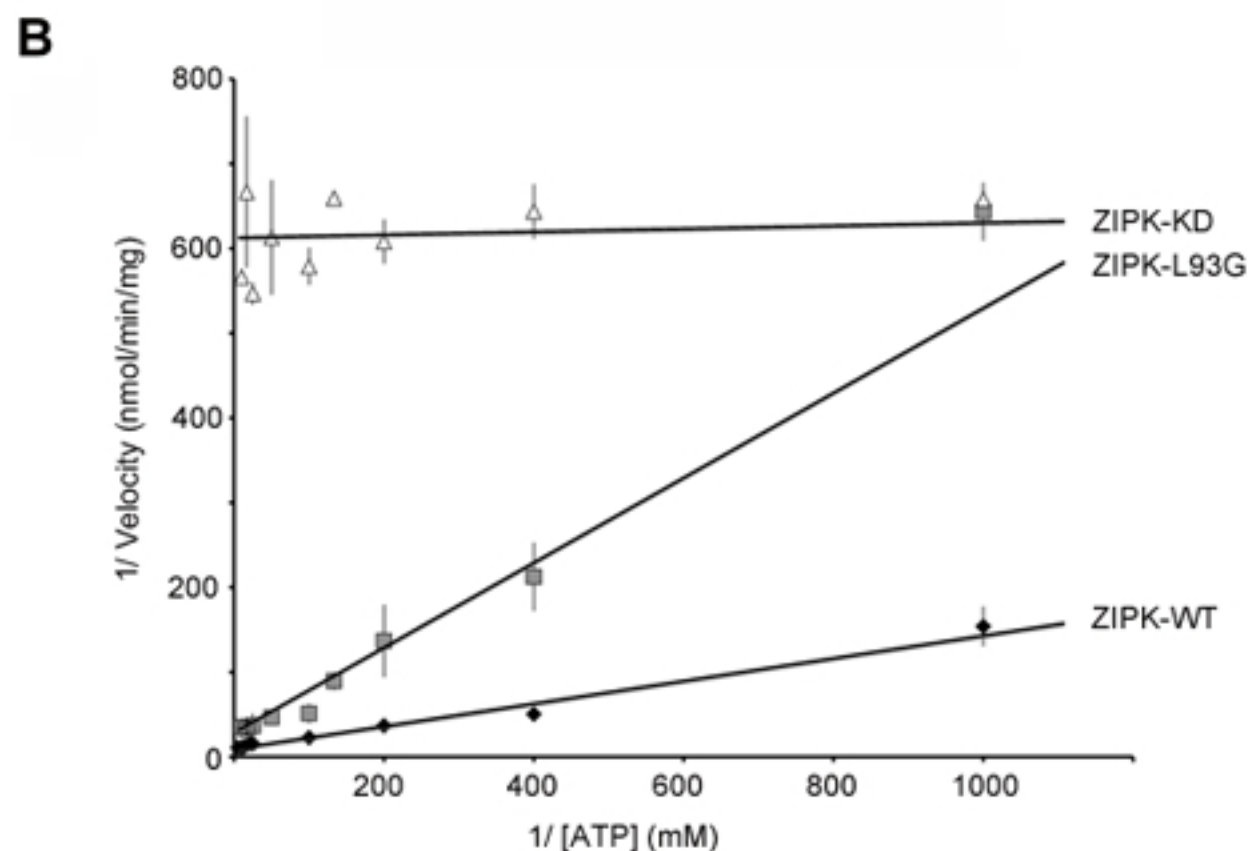

**Supplemental Figure 1. Characterization of expressed and purified ZIPK-WT, ZIPK-L93G and ZIPK-KD.** (A) Coomassie Brilliant Blue-stained SDS-polyacrylamide gradient gels (7.5 -20%) of purified ZIPK-WT, ZIPK-L93G and ZIPK-KD. (B) Lineweaver-Burk plots of the kinetics of phosphorylation of MYPT1 substrate peptide at varying ATP concentrations. Values indicate the mean  $\pm$  S.E.M. (n=3).
