# Supplementary material
Source: PubMed Central journal article supplement (PMC3196122)
Supplement: supp_M111.257949_jbc.M111.257949-2.pdf [file supp_M111.257949_jbc.M111.257949-2.pdf]

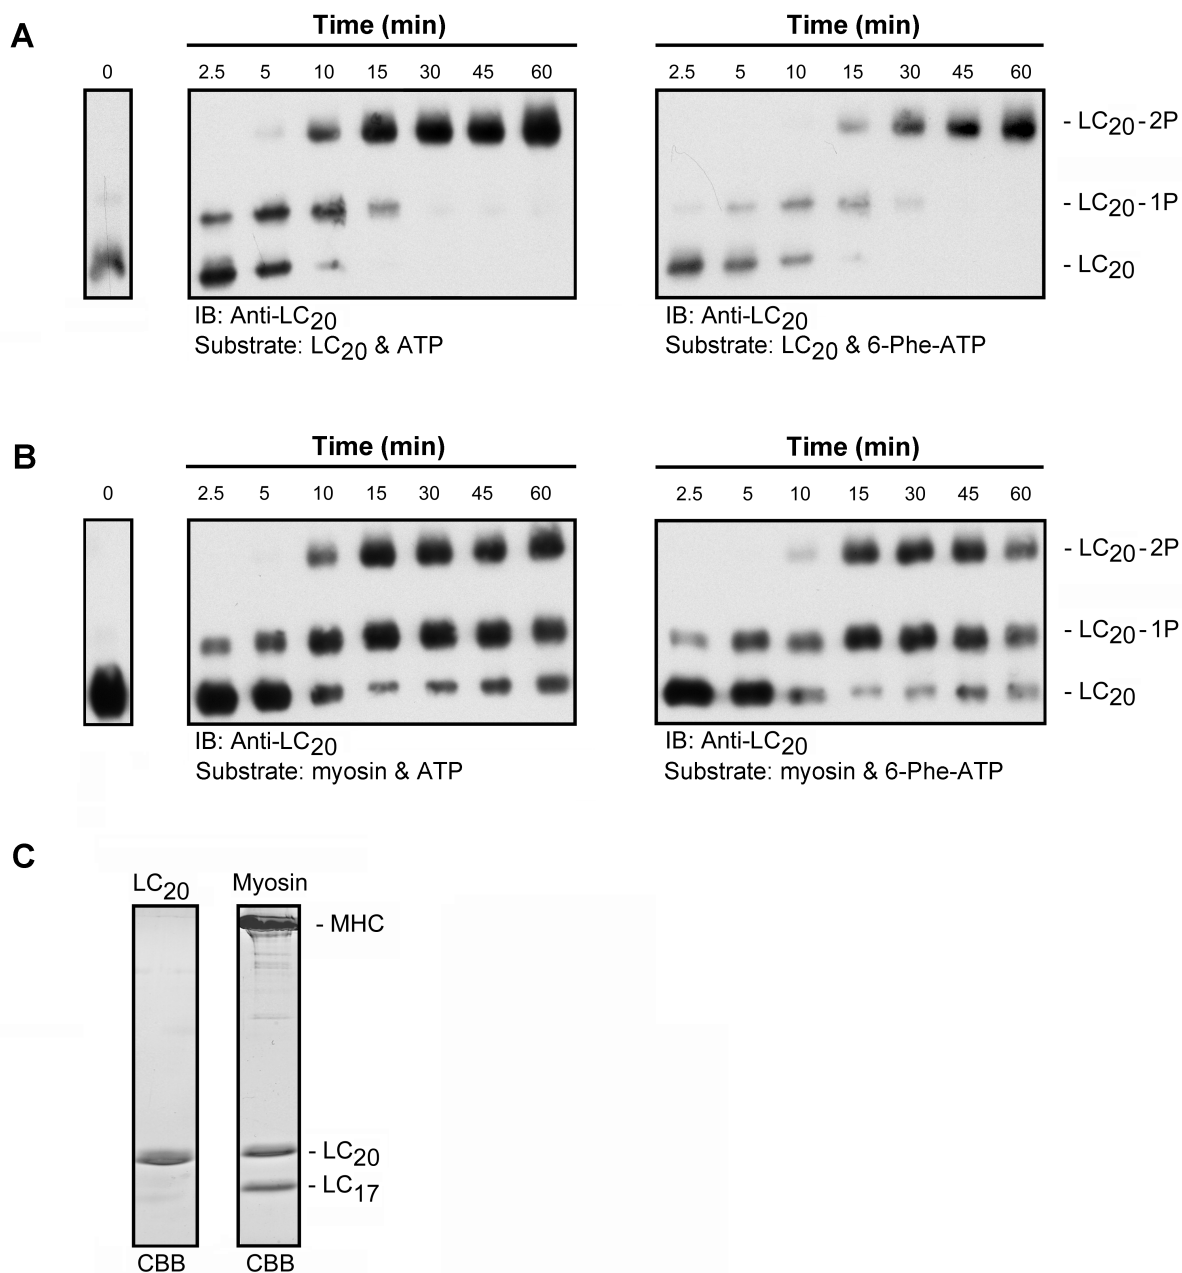

**Supplemental Figure 2. Phosphorylation of purified LC<sub>20</sub> and whole myosin by ZIPK-L93G.**

**(A)**, Purified recombinant ZIPK-L93G (0.16  $\mu$ M) was incubated with purified LC<sub>20</sub> (1  $\mu$ M) and either ATP or 6-Phe-ATP (0.2 mM) as substrate. Reactions were terminated at the indicated time, and then LC<sub>20</sub> phosphorylation status was analyzed by Phos-tag SDS-PAGE (10 ng LC<sub>20</sub>/lane) with subsequent detection of unphosphorylated, monophosphorylated (-1P) and diphosphorylated (-2P) forms by western blotting. **(B)**, Experiments were repeated with purified whole myosin as substrate at the same LC<sub>20</sub> concentration (1  $\mu$ M). **(C)**, Coomassie brilliant blue (CBB)-stained SDS-PAGE (12.5% acrylamide) of purified LC<sub>20</sub> and myosin substrates used for the phosphorylation assays. The results are representative of 3 independent experiments.
