# Supplementary material
Source: PubMed Central journal article supplement (PMC3196122)
Supplement: supp_M111.257949_jbc.M111.257949-3.pdf [file supp_M111.257949_jbc.M111.257949-3.pdf]

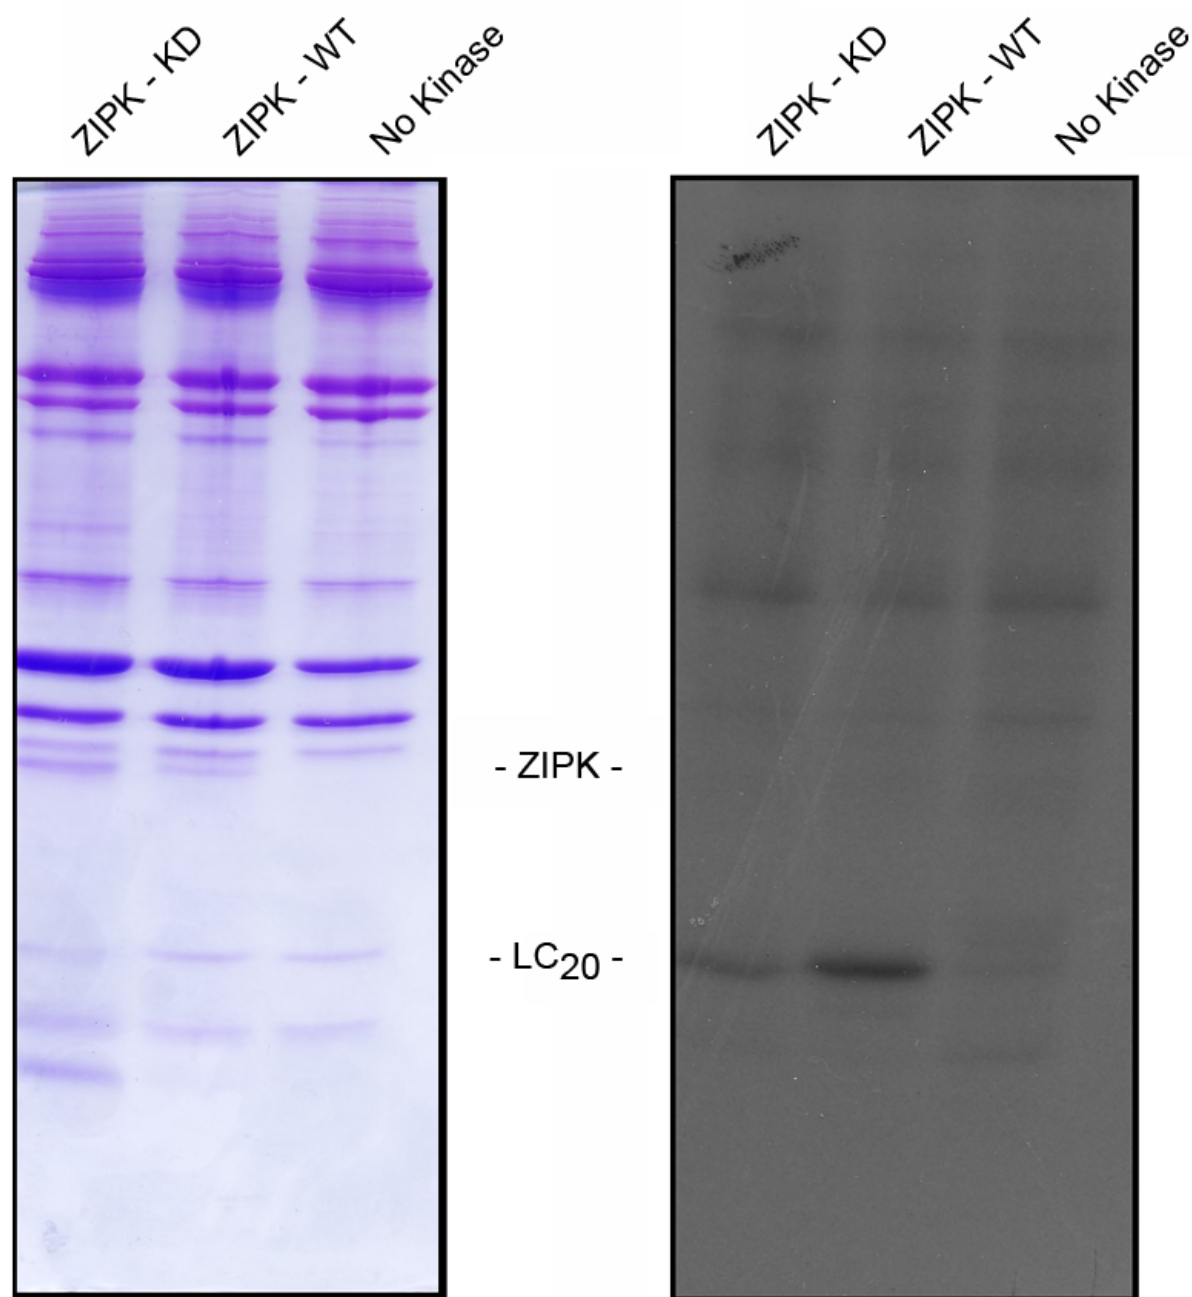

**Supplemental Figure 3. Identification of LC<sub>20</sub> as a direct substrate of ZIPK.** Triton-skinned rat caudal arterial smooth muscle strips were treated with [ $\gamma$ -<sup>32</sup>P]-ATP in the absence or presence of ZIPK-WT or ZIPK-KD. Tissue proteins were separated by SDS-PAGE (7.5 - 20% polyacrylamide gradient gels), visualized with Coomassie Brilliant Blue (left panel) and [<sup>32</sup>P]-labelled proteins detected by autoradiography (right panel). The results are representative of 3 independent experiments.
